# Supplementary material for: The translation initiation factor homolog eif4e1c regulates cardiomyocyte metabolism and proliferation during heart regeneration
Source: PubMed Central journal article supplement (PMC10281269; doi:10.1242/dev.201376), 2023-06-12
Supplement: develop-150-201376-s1.pdf [file develop-150-201376-s1.pdf]

Figure S1A

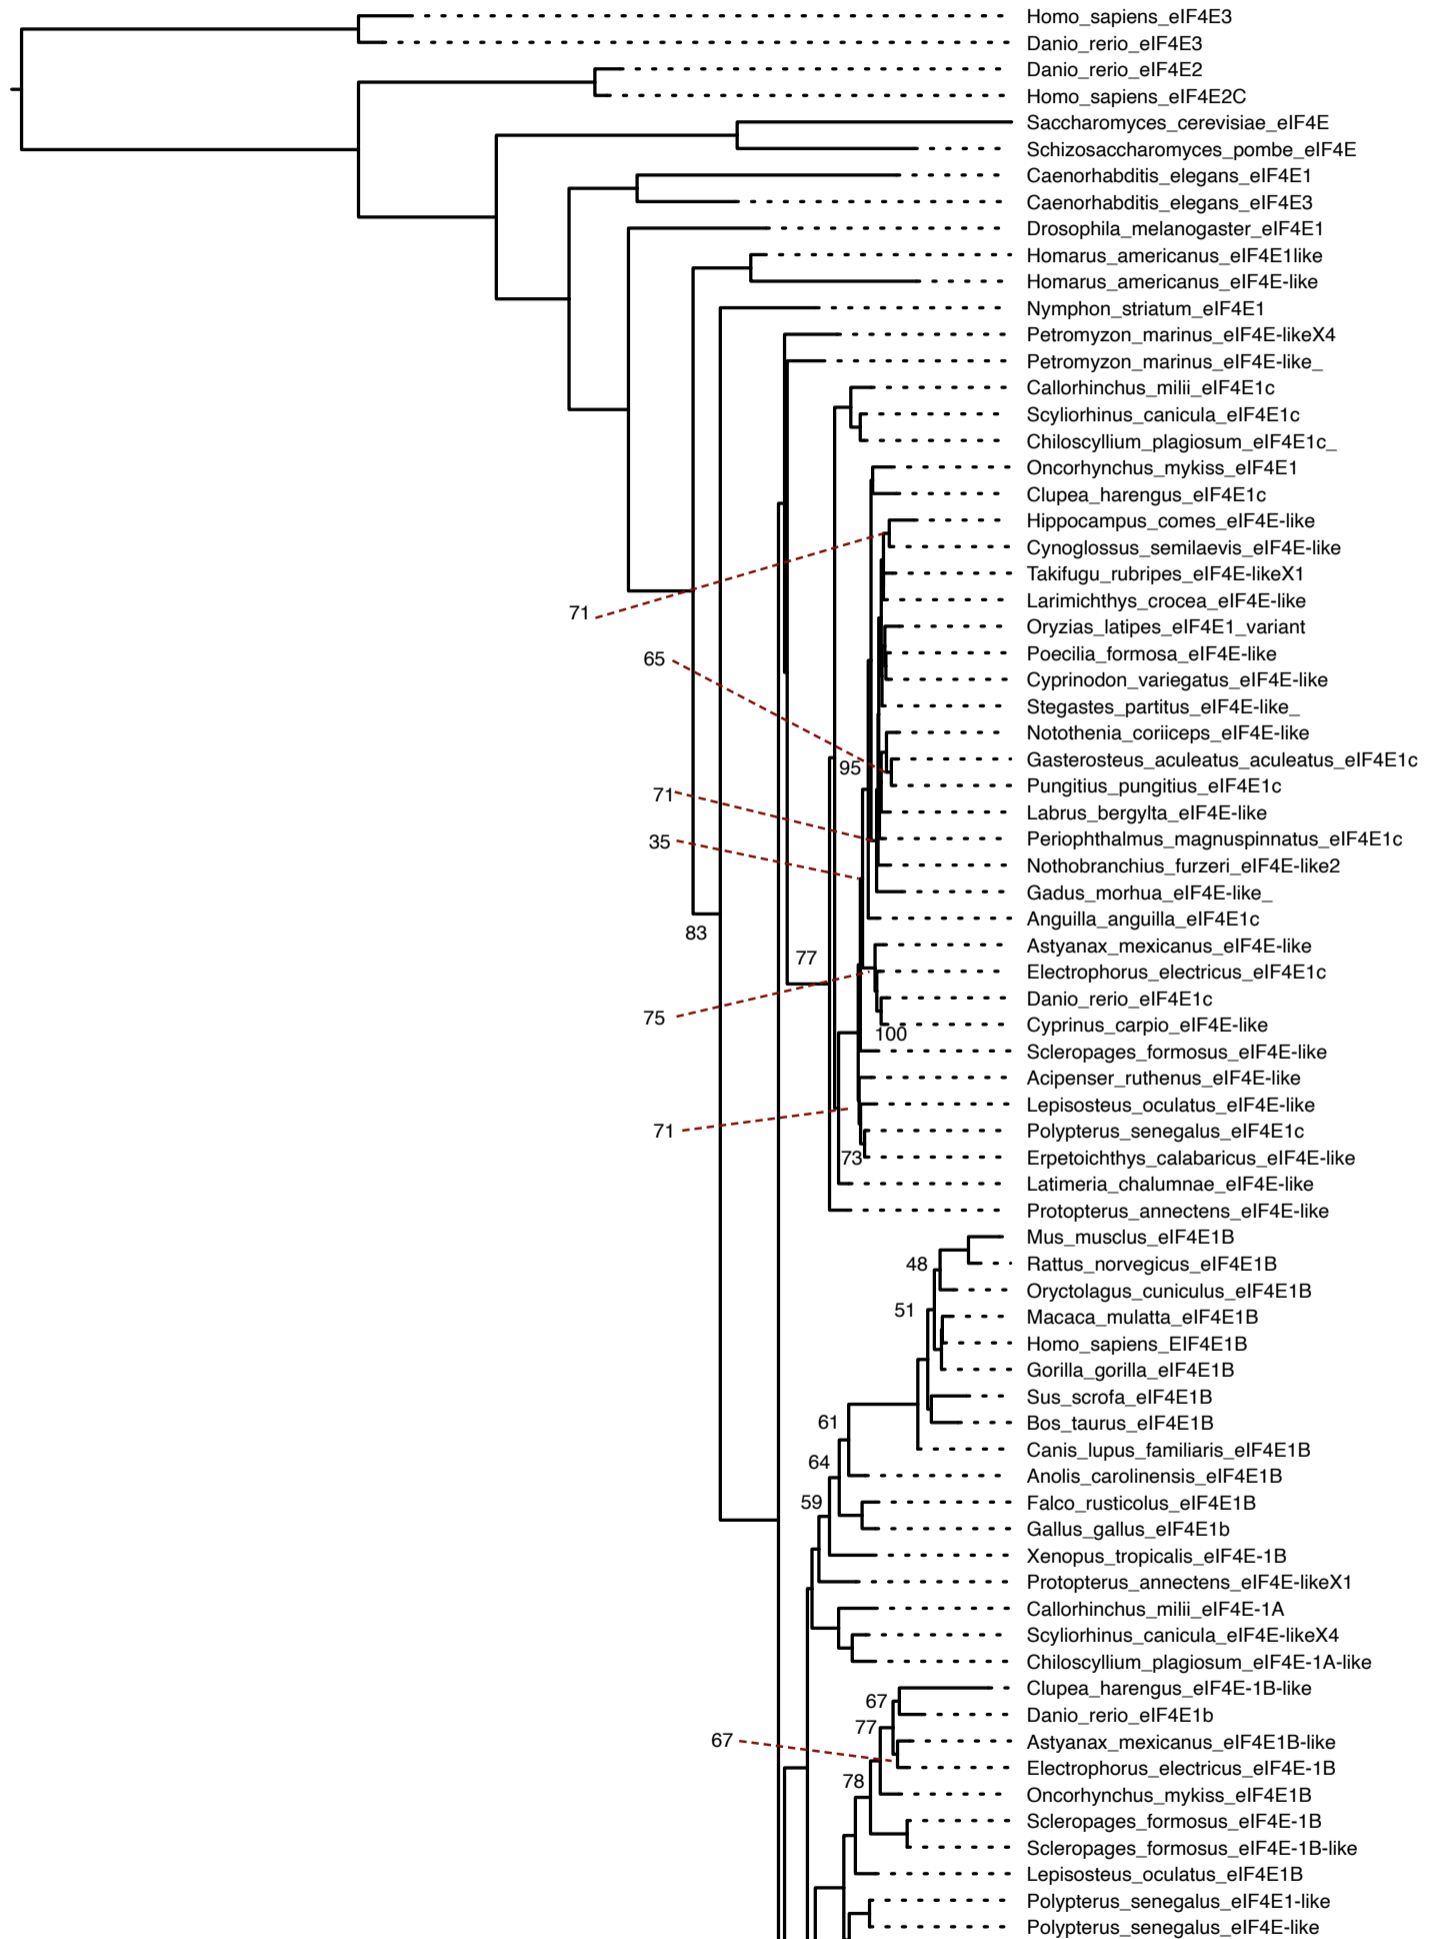

Figure S1A continued

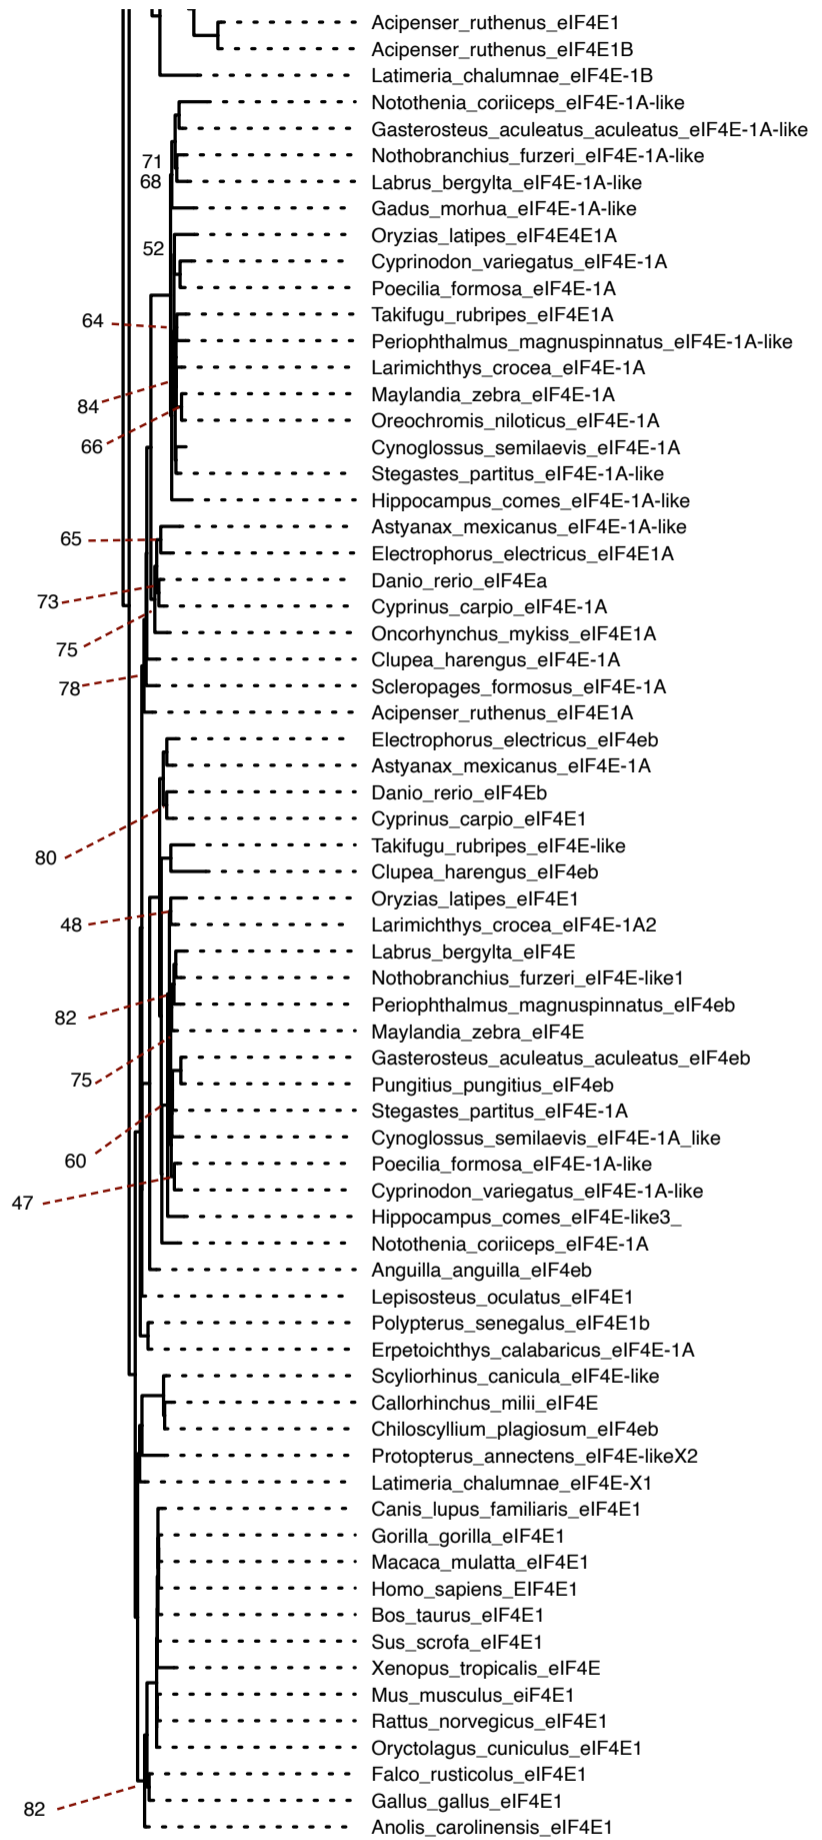

## Figure S1B

|                       |                                                                                                              |
|-----------------------|--------------------------------------------------------------------------------------------------------------|
| <b>Callorhinchus</b>  | NRWALWYFKNDKTK <b>SW</b> TENLRLIAKFDTVEDFWALYNHIQQPSK <b>LF</b> GCDY <b>CL</b> FKDGI <b>KP</b> 103           |
| <b>Scyliorhinus</b>   | NRWALWYFKNDKTK <b>G</b> TENLRLIAKFDTVEDFWALYNHIQQPSK <b>LF</b> GCDY <b>CL</b> FKDGI <b>KP</b> 105            |
| <b>Chiloscyllium</b>  | NRWALWYFKNDKTK <b>SW</b> TENLRLIAKFDTVEDFWALYNHIQQPSK <b>LF</b> GCDY <b>CL</b> FKDGI <b>KP</b> 105           |
| <b>Protopterus</b>    | NRWALWYFKNDKSK <b>SW</b> TENLRLIAKFDTVEDFWALYNHI <b>Q</b> PSK <b>LF</b> GCDY <b>CL</b> FKDGI <b>KP</b> 99    |
| <b>Oncorhynchus</b>   | NKWALWYFKNDKSK <b>SW</b> TENLRLIAKFDTVEDFWALYNHIQQPSK <b>LF</b> GCDY <b>CL</b> FKDGI <b>KP</b> 98            |
| <b>Oryzias</b>        | NRWALWYFKNDKTK <b>SW</b> TENLRLISKFDTVEDFWALYNHIQQPSK <b>V</b> LGC <b>CDY</b> <b>CL</b> FKDGI <b>KP</b> 94   |
| <b>Gadus</b>          | NKWALWYFKNDKSK <b>SW</b> TENLRLISKFDTVEDFWALYNHIQQPSK <b>LF</b> GCDY <b>CL</b> FKDGI <b>KP</b> 93            |
| <b>Notothenia</b>     | NRWALWYFKNDKSK <b>SW</b> TENLRLISKFDTVEDFWALYNHIQQPSK <b>LF</b> GCDY <b>CL</b> FKDGI <b>KP</b> 106           |
| <b>Anguilla</b>       | NRWALWYFKNDKSK <b>SW</b> TENLRLIAKFDTVEDFWALYNHIQQPSK <b>LF</b> GCDY <b>CL</b> FKDGI <b>KP</b> 95            |
| <b>Gasterosteus</b>   | NRWALWYFKNDKSK <b>SW</b> TENLRLISKFDTVEDFWALYNHIQQPSK <b>LF</b> GCDY <b>SL</b> FKDGI <b>KP</b> 92            |
| <b>Pungitius</b>      | NRWALWYFKNDKSK <b>SW</b> TENLRLISKFDTVEDFWALYNHIQQPSK <b>LF</b> GCDY <b>SL</b> FKDGI <b>KP</b> 94            |
| <b>Nothobranchius</b> | NRWALWYFKNDKSK <b>SW</b> TENLRLISKFDTVEDFWALYNHIQQPSK <b>LF</b> GCDY <b>CL</b> FKDGI <b>KP</b> 93            |
| <b>Takifugu</b>       | NRWALWYFKNDKSK <b>SW</b> TENLRLISKFDTVEDFWALYNHIQQPSK <b>LF</b> GCDY <b>CL</b> FKDGI <b>KP</b> 93            |
| <b>Labrus</b>         | NRWALWYFKNDKSK <b>SW</b> TENLRLISKFDTVEDFWALYNHIQQPSK <b>LF</b> GCDY <b>CL</b> FKDGI <b>KP</b> 94            |
| <b>Cynoglossus</b>    | NKWALWYFKNDKSK <b>SW</b> TENLRLISKFDTVEDFWALYNHIQQPSK <b>LF</b> GCDY <b>CL</b> FKDGI <b>KP</b> 91            |
| <b>Periophthalmus</b> | NRWALWYFKNDKSK <b>SW</b> TENLRLISKFDTVEDFWALYNHIQQPSK <b>LF</b> GCDY <b>CL</b> FKDGI <b>KP</b> 93            |
| <b>Poecilia</b>       | NRWALWYFKNDKSK <b>SW</b> TENLRLISKFDTVEDFWALYNHIQQPSK <b>LF</b> GCDY <b>SL</b> FKDGI <b>KP</b> 93            |
| <b>Cyprinodon</b>     | NRWALWYFKNDKSK <b>SW</b> TENLRLISKFDTVEDFWALYNHIQQPSK <b>LF</b> GCDY <b>SL</b> FKDGI <b>KP</b> 93            |
| <b>Stegastes</b>      | NRWALWYFKNDKSK <b>SW</b> TENLRLISKFDTVEDFWALYNHIQQPSK <b>LF</b> GCDY <b>CL</b> FKDGI <b>KP</b> 93            |
| <b>Maylandia</b>      | NRWALWYFKNDKSK <b>SW</b> TENLRLISKFDTVEDFWALYNHIQQPSK <b>LF</b> GCDY <b>CL</b> FKDGI <b>KP</b> 93            |
| <b>Oreochromis</b>    | NRWALWYFKNDKSK <b>SW</b> TENLRLISKFDTVEDFWALYNHIQQPSK <b>LF</b> GCDY <b>CL</b> FKDGI <b>KP</b> 93            |
| <b>Larimichthys</b>   | NRWALWYFKNDKSK <b>SW</b> TENLRLISKFDTVEDFWALYNHIQQPSK <b>LF</b> GCDY <b>CL</b> FKDGI <b>KP</b> 93            |
| <b>Latimeria</b>      | NKWALWYFKNDKSK <b>SW</b> TENLRLIAKFDTVEDFWALYNHIQQPSK <b>LF</b> GCDY <b>CL</b> FKDGI <b>KP</b> 116           |
| <b>Clupea</b>         | NRWALWYFKNDKSK <b>SW</b> TENLRLIAKFDTVEDFWALYNHIQQPSK <b>LF</b> GCDY <b>CL</b> FKDGI <b>KP</b> 117           |
| <b>Danio</b>          | NRWALWYFKNDKSK <b>SW</b> TENLRLISKFDTVEDFWALYNHIQQPSK <b>LF</b> GCDY <b>CL</b> FKDGI <b>KP</b> 96            |
| <b>Cyprinus</b>       | NRWALWYFKNDKSK <b>SW</b> TENLRLISKFDTVEDFWALYNHIQQPSK <b>LF</b> GCDY <b>SL</b> FKDGI <b>KP</b> 96            |
| <b>Astyanax</b>       | NRWALWYFKNDKSK <b>SW</b> TENLRLISKFDTVEDFWALYNHIQQPSK <b>LF</b> GCDY <b>CL</b> FKDGI <b>KP</b> 114           |
| <b>Electrophorus</b>  | NRWALWYFKNDKSK <b>SW</b> TENLRLISKFDTVEDFWALYNHIQQPSK <b>LF</b> GCDY <b>CL</b> FKDGI <b>KP</b> 95            |
| <b>Scleropages</b>    | NRWALWYFKNDKSK <b>SW</b> TENLRLIAKFDTVEDFWALYNHIQQPSK <b>LF</b> GCDY <b>CL</b> FKDGI <b>KP</b> 95            |
| <b>Acipenser</b>      | NKWALWYFKNDKSK <b>SW</b> TENLRLIAKFDTVEDFWALYNHIQQPSK <b>LF</b> GCDY <b>CL</b> FKDGI <b>KP</b> 95            |
| <b>Lepisosteus</b>    | NRWALWYFKNDKSK <b>SW</b> TENLRLIAKFDTVEDFWALYNHIQQPSK <b>LF</b> GCDY <b>CL</b> FKDGI <b>KP</b> 95            |
| <b>Polypterus</b>     | NRWALWYFKNDKSK <b>SW</b> TENLRLIAKFDTVEDFWALYNHIQQPSK <b>LF</b> GCDY <b>CL</b> FKDGI <b>KP</b> 95            |
| <b>Erpetoichthys</b>  | NRWALWYFKNDKSK <b>SW</b> TENLRLIAKFDTVEDFWALYNHIQQPSK <b>LF</b> GCDY <b>CL</b> FKDGI <b>KP</b> 96            |
| <b>Hippocampus</b>    | NRWALWYFKNDKSK <b>SW</b> TENLRLISKFDTVEDFWALYNHIQQPSK <b>V</b> YGC <b>CDY</b> <b>CL</b> FKDGI <b>KP</b> 100  |
| <b>Petromyzon</b>     | NRWALWYFKNDKSK <b>SW</b> QANLRLITKVDTVEDFWALYNHI <b>Q</b> VASRL <b>MP</b> GCDY <b>SL</b> FKDGI <b>EP</b> 102 |

\*:\*\*\*\*:\*\*\*\*:\* \* \*\*\*\*\*:\*.\*\*\*\*\* \*.\* \*\*\*\*.\*\*\*\*\*:\*

### Sharks

Lungfish

Seahorse

Lamprey

Spotted Gar – recently diverged from teleost

Gray bichir – dragon eel – similar to lungfish

Mudskippers – technically teleost but use fins as legs

Reedfish – bichir – snake fish

Eel

Teleost

## Figure S1B continued

|                       |                                                                                                                                                                                                |
|-----------------------|------------------------------------------------------------------------------------------------------------------------------------------------------------------------------------------------|
| <b>Callorhinchus</b>  | MWED <b>D</b> KNK <b>K</b> GGRWLM <b>T</b> LT <b>K</b> QQRHNDLDRYWLETLLCLIGEA <b>F</b> D <b>E</b> HSDEVCGAVV <b>N</b> VR <b>P</b> KG 163                                                       |
| <b>Scyliorhinus</b>   | MWED <b>D</b> KNK <b>K</b> GGRWLM <b>T</b> LN <b>K</b> QQRHNDLDRYWLETLLCLIGEA <b>F</b> D <b>E</b> HSDEVCGAVV <b>N</b> VR <b>P</b> KG 165                                                       |
| <b>Chiloscyllium</b>  | MWED <b>D</b> KNK <b>R</b> GGRWLM <b>T</b> LN <b>K</b> QQRHNDLDRYWLETLLCLIGEA <b>F</b> D <b>E</b> FSDEVCGAVV <b>N</b> VR <b>P</b> KG 165                                                       |
| <b>Protopterus</b>    | MWED <b>E</b> LN <b>K</b> Q <b>G</b> GRW <b>L</b> I <b>T</b> LN <b>K</b> QQRHNDLDRYWLETLLCLIGEA <b>F</b> N <b>D</b> YSDDVCGAVV <b>N</b> VR <b>P</b> KG 159                                     |
| <b>Oncorhynchus</b>   | MWED <b>D</b> KNK <b>L</b> GGRWLM <b>T</b> LS <b>K</b> QQR <b>Q</b> IDLDRYW <b>M</b> ETLLCLIGES <b>F</b> D <b>E</b> ASEDVC <b>G</b> AVV <b>N</b> VR <b>P</b> KG 158                            |
| <b>Oryzias</b>        | MWED <b>D</b> KNK <b>L</b> GGRWLM <b>T</b> LN <b>K</b> Q-KHNDLDRYW <b>M</b> ETLLCLV <b>G</b> ES <b>F</b> D <b>D</b> A <b>S</b> EEVCGAVV <b>N</b> VR <b>H</b> KG 153                            |
| <b>Gadus</b>          | MWED <b>D</b> RN <b>K</b> L <b>G</b> GRWLM <b>T</b> LN <b>K</b> QQRHNDLDRYW <b>M</b> ETLLCLV <b>G</b> ES <b>F</b> D <b>E</b> SEDEVCGAVV <b>N</b> VR <b>P</b> KG 153                            |
| <b>Notothenia</b>     | MWED <b>D</b> RN <b>K</b> L <b>G</b> GRWLM <b>T</b> LN <b>K</b> QQRHNDLDRYW <b>M</b> ETLLCLV <b>G</b> ES <b>F</b> D <b>A</b> ASEDV <b>N</b> GAVV <b>N</b> VR <b>P</b> KG 166                   |
| <b>Anguilla</b>       | MWED <b>D</b> RN <b>K</b> L <b>G</b> GRWLM <b>T</b> LN <b>K</b> QQRHNDLDRYW <b>M</b> ETLLCLV <b>G</b> ES <b>F</b> D <b>E</b> ASDDVCGAVV <b>N</b> VR <b>P</b> KG 155                            |
| <b>Gasterosteus</b>   | MWED <b>D</b> RN <b>K</b> L <b>G</b> GRWLM <b>T</b> LN <b>K</b> QQRHNDLDRYW <b>M</b> ETLLCLV <b>G</b> ES <b>F</b> D <b>E</b> ASEDVC <b>G</b> AVV <b>N</b> VR <b>P</b> KG 152                   |
| <b>Pungitius</b>      | MWED <b>D</b> RN <b>K</b> L <b>G</b> GRWLM <b>T</b> LN <b>K</b> QQRHNDLDRYW <b>M</b> ETLLCLV <b>G</b> ES <b>F</b> D <b>E</b> ASEDVC <b>G</b> AVV <b>N</b> VR <b>P</b> KG 154                   |
| <b>Nothobranchius</b> | MWED <b>E</b> RN <b>K</b> L <b>G</b> GRW <b>L</b> I <b>T</b> LN <b>R</b> QQRHNDLDRYW <b>M</b> ETLLCLV <b>G</b> ES <b>F</b> D <b>E</b> ASDDVCGAVV <b>N</b> VR <b>P</b> KG 153                   |
| <b>Takifugu</b>       | MWED <b>D</b> RN <b>K</b> L <b>G</b> GRWLM <b>T</b> LN <b>K</b> QQRHNDLDRYW <b>M</b> ETLLCLV <b>G</b> ES <b>F</b> D <b>E</b> ASDDVCGAVV <b>N</b> VR <b>P</b> KG 153                            |
| <b>Labrus</b>         | MWED <b>D</b> RN <b>K</b> L <b>G</b> GRWLM <b>T</b> LN <b>K</b> QQRHNDLDRYW <b>M</b> ETLLCLV <b>G</b> ES <b>F</b> D <b>E</b> ASEDVC <b>G</b> AVV <b>N</b> VR <b>P</b> KG 154                   |
| <b>Cynoglossus</b>    | MWED <b>D</b> RN <b>K</b> L <b>G</b> GRWLM <b>T</b> LN <b>K</b> QQRHNDLDRYW <b>M</b> ETLLCLV <b>G</b> ES <b>F</b> D <b>E</b> ASEDVC <b>G</b> AVV <b>N</b> VR <b>P</b> KG 151                   |
| <b>Periophthalmus</b> | MWED <b>D</b> RN <b>K</b> L <b>G</b> GRWLM <b>T</b> LN <b>K</b> QQRHNDLDRYW <b>M</b> ETLLCLV <b>G</b> ES <b>F</b> D <b>E</b> ASEDVC <b>G</b> AVV <b>N</b> VR <b>P</b> KG 153                   |
| <b>Poecilia</b>       | MWED <b>D</b> RN <b>K</b> L <b>G</b> GRWLM <b>T</b> LN <b>K</b> QQRHNDLDRYW <b>M</b> ETLLCLV <b>G</b> ES <b>F</b> D <b>E</b> ASEEVC <b>G</b> AVV <b>N</b> VR <b>P</b> KG 153                   |
| <b>Cyprinodon</b>     | MWED <b>D</b> RN <b>K</b> L <b>G</b> GRWLM <b>T</b> LN <b>K</b> QQRHNDLDRYW <b>M</b> ETLLCLV <b>G</b> DS <b>F</b> D <b>E</b> ASEDVC <b>G</b> AVV <b>N</b> VR <b>P</b> KG 153                   |
| <b>Stegastes</b>      | MWED <b>D</b> RN <b>K</b> L <b>G</b> GRWLM <b>T</b> LN <b>K</b> QQRHNDLDRYW <b>M</b> ETLLCLV <b>G</b> ES <b>F</b> D <b>E</b> ASEDVC <b>G</b> AVV <b>N</b> VR <b>P</b> KG 153                   |
| <b>Maylandia</b>      | MWED <b>D</b> RN <b>K</b> L <b>G</b> GRWLM <b>T</b> LN <b>K</b> QQRHNDLDRYW <b>M</b> ETLLCLV <b>G</b> ES <b>F</b> D <b>E</b> ASEDVC <b>G</b> AVV <b>N</b> VR <b>P</b> KG 153                   |
| <b>Oreochromis</b>    | MWED <b>D</b> RN <b>K</b> L <b>G</b> GRWLM <b>T</b> LN <b>K</b> QQRHNDLDRYW <b>M</b> ETLLCLV <b>G</b> ES <b>F</b> D <b>E</b> ASEDVC <b>G</b> AVV <b>N</b> VR <b>P</b> KG 153                   |
| <b>Larimichthys</b>   | MWED <b>D</b> RN <b>K</b> L <b>G</b> GRWLM <b>T</b> LN <b>K</b> QQRHNDLDRYW <b>M</b> ETLLCLV <b>G</b> ES <b>F</b> D <b>E</b> ASEDVC <b>G</b> AVV <b>N</b> VR <b>P</b> KG 153                   |
| <b>Latimeria</b>      | MWED <b>E</b> NN <b>K</b> R <b>G</b> GRWLM <b>T</b> LN <b>K</b> QQRHNDLDRYWLETLLCLIGES <b>F</b> D <b>E</b> HSDDVCGAVV <b>N</b> VR <b>P</b> KG 176                                              |
| <b>Clupea</b>         | MWED <b>D</b> RN <b>K</b> L <b>G</b> GRWLM <b>T</b> LS <b>K</b> QQRHNDLDRYW <b>M</b> ETLLCLV <b>G</b> ES <b>F</b> D <b>E</b> ASEDAC <b>G</b> AVV <b>N</b> VR <b>P</b> KG 177                   |
| <b>Danio</b>          | MWED <b>D</b> RN <b>K</b> L <b>G</b> GRWLM <b>T</b> LS <b>K</b> QQRHNDLDRYW <b>M</b> ETLLCLV <b>G</b> ES <b>F</b> D <b>E</b> ASEDVC <b>G</b> AVV <b>N</b> VR <b>P</b> KG 156                   |
| <b>Cyprinus</b>       | MWED <b>D</b> RN <b>K</b> L <b>G</b> GRWLM <b>T</b> LS <b>K</b> QQRHNDLDRYW <b>M</b> ETLLCLV <b>G</b> ES <b>F</b> D <b>E</b> ASEDVC <b>G</b> AVV <b>N</b> VR <b>P</b> KG 156                   |
| <b>Astyanax</b>       | MWED <b>D</b> RN <b>K</b> L <b>G</b> GRWLM <b>T</b> LS <b>K</b> QQRHNDLDRYW <b>M</b> ETLLCLV <b>G</b> ES <b>F</b> D <b>E</b> ASEDVC <b>G</b> AVV <b>N</b> VR <b>P</b> KG 174                   |
| <b>Electrophorus</b>  | MWED <b>D</b> RN <b>K</b> L <b>G</b> GRWLM <b>T</b> LN <b>K</b> QQRHNDLDRYW <b>M</b> ETLLCLV <b>G</b> ES <b>F</b> D <b>E</b> ASEDVC <b>G</b> AVV <b>N</b> VR <b>P</b> KG 155                   |
| <b>Scleropages</b>    | MWED <b>D</b> RN <b>K</b> L <b>G</b> GRW <b>L</b> I <b>T</b> LS <b>K</b> QQRHNDLDRYW <b>M</b> ETLLCLV <b>G</b> ES <b>F</b> D <b>D</b> A <b>S</b> EDIC <b>G</b> AVV <b>N</b> VR <b>P</b> KG 155 |
| <b>Acipenser</b>      | MWED <b>D</b> RN <b>K</b> L <b>G</b> GRWLM <b>T</b> LN <b>K</b> QQRHNDLDRYW <b>M</b> ETLLCLV <b>G</b> ES <b>F</b> D <b>E</b> ASEDVC <b>G</b> AVV <b>N</b> VR <b>P</b> KG 155                   |
| <b>Lepisosteus</b>    | MWED <b>D</b> RN <b>K</b> L <b>G</b> GRWLM <b>T</b> LG <b>K</b> QQRHNDLDRYW <b>M</b> ETLLCLV <b>G</b> ES <b>F</b> D <b>E</b> ASDDVCGAVV <b>N</b> VR <b>P</b> KG 155                            |
| <b>Polypterus</b>     | MWED <b>D</b> RN <b>K</b> L <b>G</b> GRW <b>L</b> I <b>T</b> LS <b>K</b> QQRHNDLDRYW <b>M</b> ETLLCLV <b>G</b> ES <b>F</b> D <b>E</b> ASEDVC <b>G</b> AVV <b>N</b> VR <b>P</b> KG 155          |
| <b>Erpetoichthys</b>  | MWED <b>D</b> RN <b>K</b> L <b>G</b> GRW <b>L</b> I <b>T</b> LS <b>K</b> QQRHNDLDRYW <b>M</b> ETLLCLV <b>G</b> ES <b>F</b> D <b>E</b> ASEDVC <b>G</b> AVV <b>N</b> VR <b>P</b> KG 156          |
| <b>Hippocampus</b>    | MWED <b>D</b> RN <b>K</b> L <b>G</b> GRWLM <b>T</b> LN <b>K</b> VQRHNDLDRYW <b>M</b> ETLLCLV <b>G</b> ES <b>F</b> D <b>E</b> ASDDVCGAVV <b>N</b> VR <b>H</b> KA 160                            |
| <b>Petromyzon</b>     | MWED <b>E</b> RN <b>K</b> R <b>G</b> GRW <b>L</b> I <b>T</b> LT <b>K</b> TQRHSDLDRYWLETLLCLIGEA <b>F</b> D <b>D</b> HSDDVCGAVV <b>N</b> VR <b>P</b> KA 162                                     |

\*\*\*\*: \*: \*\*\*\*\*:\*\* : : \*\*\*\*\*:\*\*\*\*\*:\*\*\*: \*:: \*\*\*:\*\*\* \*

**Sharks**

**Lungfish**

**Seahorse**

**Lamprey**

Spotted Gar – diverged from teleost

Gray bichir – dragon eel – appears lungfish

Mudskippers – technically teleost but use fins as legs

**Reedfish – bichir – snake fish**

**Eel**

**Teleost**

## Figure S1B continued

|                       |                                                                                                       |     |
|-----------------------|-------------------------------------------------------------------------------------------------------|-----|
| <b>Callorhinchus</b>  | DKISIWGT <b>NCQ</b> SREAV <b>T</b> SIGQSYKERLGLPMKALIGYQSH <b>DDTSSK</b> SGSTTKN <b>LYTV</b>          | 220 |
| <b>Scyliorhinus</b>   | DKIAIWTG <b>NCQ</b> NREAI <b>V</b> SIGQLYKERLGLSLKALIGYQSH <b>DDTSSK</b> SGSTTKN <b>LFSV</b>          | 222 |
| <b>Chiloscyllium</b>  | DKIAIWTG <b>NCQ</b> NRDA <b>V</b> SIGQLYKERLGLSLKALIGYQSH <b>DDTSSK</b> SGSTTKN <b>LFSV</b>           | 222 |
| <b>Protopterus</b>    | DKLSIWTT <b>NCQ</b> NREAV <b>V</b> SIGQSYKERLGLPLKPVIGYQSH <b>DDTSTK</b> SGSTTKN <b>LYSA</b>          | 216 |
| <b>Oncorhynchus</b>   | DKISIWGT <b>NCQ</b> NKEAI <b>V</b> AIGQQYKERLSIPIKLLIGYQSH <b>DDTSSK</b> SGSTTKN <b>MYSV</b>          | 215 |
| <b>Oryzias</b>        | DKISIWGT <b>NCQ</b> NKEAI <b>I</b> MTIGQLYKERLNLPMKAIIGYQSH <b>DDTSSK</b> SGSTTKN <b>MYSV</b>         | 210 |
| <b>Gadus</b>          | DKIAIWTS <b>NCQ</b> NRDA <b>I</b> V <b>T</b> IGAGYKERLCLPSKPLISYQSH <b>DDTSSK</b> SGSTTKN <b>MYSV</b> | 210 |
| <b>Notothenia</b>     | DKISIWTS <b>NCQ</b> NRDA <b>I</b> MTIGQNYKERLSIPTKAIIGYQSH <b>DDTSSK</b> SGSTTKN <b>IFSV</b>          | 223 |
| <b>Anguilla</b>       | DKLAIWTG <b>NCQ</b> NRDA <b>I</b> MTIGQYKERLNIIPSKALIGYQSH <b>DDTSSK</b> SGSTTKN <b>MYTV</b>          | 212 |
| <b>Gasterosteus</b>   | DKISIWTS <b>QCQ</b> NRDA <b>I</b> MTIGQNYKERLNIPTKAIIGYQSH <b>DDTSSK</b> SGSTTKN <b>MYSV</b>          | 209 |
| <b>Pungitius</b>      | DKISIWTS <b>QCQ</b> NRDA <b>I</b> MTIGQNYKERLNIPTKAIIGYQSH <b>DDTSSK</b> SGSTTKN <b>MYSV</b>          | 211 |
| <b>Nothobranchius</b> | DKLAIWTS <b>NCQ</b> NREAI <b>I</b> MTIGQLYKERLSLPVKALIGYQSH <b>DDTSSK</b> SGSTTKN <b>MYSV</b>         | 210 |
| <b>Takifugu</b>       | DKIAIWTS <b>NCQ</b> NREAI <b>I</b> MTIGQLYKERLNIPIKAMLYQSH <b>DDTSSK</b> SGSTTKN <b>MYSI</b>          | 210 |
| <b>Labrus</b>         | DKISIWTS <b>NCQ</b> NRDA <b>I</b> MTIGQLYKERLTVPIKALIGYQSH <b>DDTSSK</b> SGSTTKN <b>MYSV</b>          | 211 |
| <b>Cynoglossus</b>    | DKIAIWTS <b>NCQ</b> NREAI <b>I</b> MTIGQYKERLNIPIKAMIGYQSH <b>DDTSSK</b> SGSTTKN <b>MYSV</b>          | 208 |
| <b>Periophthalmus</b> | DKIAIWTS <b>NCQ</b> NRDA <b>I</b> MTIGQLYKERLSIPMKALIGYQSH <b>DDTSSK</b> SGSTTKN <b>MYSV</b>          | 210 |
| <b>Poecilia</b>       | DKISIWTS <b>NCQ</b> NREAI <b>I</b> MTIGQLYKERLNIPIKAMIGYQSH <b>DDTSSK</b> SGSTTKN <b>MYSV</b>         | 210 |
| <b>Cyprinodon</b>     | DKISIWTS <b>NCQ</b> NREAI <b>I</b> MTIGQLYKERLNLPIKAMIGYQSH <b>DDTSSK</b> SGSTTKN <b>MYSV</b>         | 210 |
| <b>Stegastes</b>      | DKIAIWTS <b>NCQ</b> NREAI <b>I</b> MTIGQLYKERLNLPIKAMIGYQSH <b>DDTSSK</b> SGSTTKN <b>MYSV</b>         | 210 |
| <b>Maylandia</b>      | DKISIWTS <b>NCQ</b> NRDA <b>I</b> MTIGQLYKERLNLPMKAMIGYQSH <b>DDTSSK</b> SGSTTKN <b>MYSV</b>          | 210 |
| <b>Oreochromis</b>    | DKISIWTS <b>NCQ</b> NRDA <b>I</b> MTIGQLYKERLNLPMKAMIGYQSH <b>DDTSSK</b> SGSTTKN <b>MYSV</b>          | 210 |
| <b>Larimichthys</b>   | DKIAIWTS <b>NCQ</b> NRDA <b>I</b> MTIGQLYKERLNIPIKAMIGYQSH <b>DDTSSK</b> SGSTTKN <b>MYSV</b>          | 210 |
| <b>Latimeria</b>      | DKIAIWTT <b>SCQ</b> NREAI <b>I</b> MSIGQSYKERLGLPLKALIGYQSH <b>DDTSSK</b> SGSTTKN <b>MYTV</b>         | 233 |
| <b>Clupea</b>         | DKIAIWTA <b>NCQ</b> NRES <b>I</b> MTIGQYKERLSIPNKTLIGYQSH <b>DDTSSK</b> SGSTTKN <b>MYSV</b>           | 234 |
| <b>Danio</b>          | DKIAIWGT <b>NCQ</b> NRDA <b>I</b> MTIGQYKERLSLPSKTLIGYQSH <b>DDTSSK</b> SGSTTKN <b>MYSV</b>           | 213 |
| <b>Cyprinus</b>       | DKISIWGT <b>NCQ</b> NRDA <b>I</b> MTIGQYKERLSLPIKTLIGYQSH <b>DDTSSK</b> SGSTTKN <b>MYSV</b>           | 213 |
| <b>Astyanax</b>       | DKIAIWGT <b>NCQ</b> NRDA <b>I</b> MTIGLQYKERLNLPIKTLIGYQSH <b>DDTSSK</b> SGSTTKN <b>MYSV</b>          | 231 |
| <b>Electrophorus</b>  | DKIAIWTC <b>NCQ</b> NRDA <b>I</b> MTIGQYKERLNLPIKTLIGYQSH <b>DDTSSK</b> SGSTTKN <b>MYSV</b>           | 212 |
| <b>Scleropages</b>    | DKIAIWTV <b>NCQ</b> NREAI <b>I</b> MTIGQYKERLNVVPSKALIGYQSH <b>DDTSSK</b> SGSTTKN <b>MYTV</b>         | 212 |
| <b>Acipenser</b>      | DKLAIWTG <b>NCQ</b> NKEAI <b>I</b> MTIGQYKERLSVPSKALIGYQSH <b>DDTSSK</b> SGSTTKN <b>IFTV</b>          | 212 |
| <b>Lepisosteus</b>    | DKISIWGT <b>NCQ</b> NKEAI <b>I</b> MTIGQYKERLNVVPSKALIGYQSH <b>DDTSSK</b> SGSTTKN <b>MYTV</b>         | 212 |
| <b>Polypterus</b>     | DKIAIWGT <b>NCQ</b> NKEAI <b>I</b> MTIGQLYKERLNMPLKALLGYQSH <b>DDTSSK</b> SGSTTKN <b>MYTV</b>         | 212 |
| <b>Erpetoichthys</b>  | DKIAIWGT <b>NCQ</b> NKEAI <b>I</b> MTIGQLYKERLNMPLKAILGYQSH <b>DDTSSK</b> SGSTTKN <b>MYTV</b>         | 213 |
| <b>Hippocampus</b>    | DKIAIWTS <b>NCQ</b> NREAI <b>I</b> MKIGETYKDLLSIPSKAMLYQSH <b>DDTSSK</b> SGSTTKN <b>MYSI</b>          | 217 |
| <b>Petromyzon</b>     | DKIAVWTAD <b>CD</b> NRES <b>V</b> VGIGRVYKDRLLALPPRIIIGYQSH <b>DDTATK</b> SGSSTTKN <b>MFTV</b>        | 219 |

\*\*:::\*\* . :::: : \*\* \*\*:\*\* : : :::\*\*\*\* \*\*:\*\*\*\*:\*\*\* :

- Sharks**
- Lungfish**
- Seahorse**
- Lamprey**
- Spotted Gar – diverged from teleost**
- Gray bichir – dragon eel – appears lungfish**
- Mudskippers – technically teleost but use fins as legs**
- Reedfish – bichir – snake fish**
- Eel**
- Teleost**

**Fig. S1. Phylogeny and conservation of eif4E orthologs.**

(A) Shown is the phylogeny of Eif4e1c orthologues (all 53 species with 142 homologs) estimated using maximum likelihood using IQ-TREE. Nodes with bootstrap support < 0.85 are marked with their respective values, all other nodes had support values of 0.85 or higher. (B) ClustalW sequence alignment of Eif4e1c from aquatic vertebrate. Species names are color-coded by type with the legend on the bottom. Conserved Eif4e1c specific residues are highlighted in red bold with similar residues highlighted in pink.

Figure S2

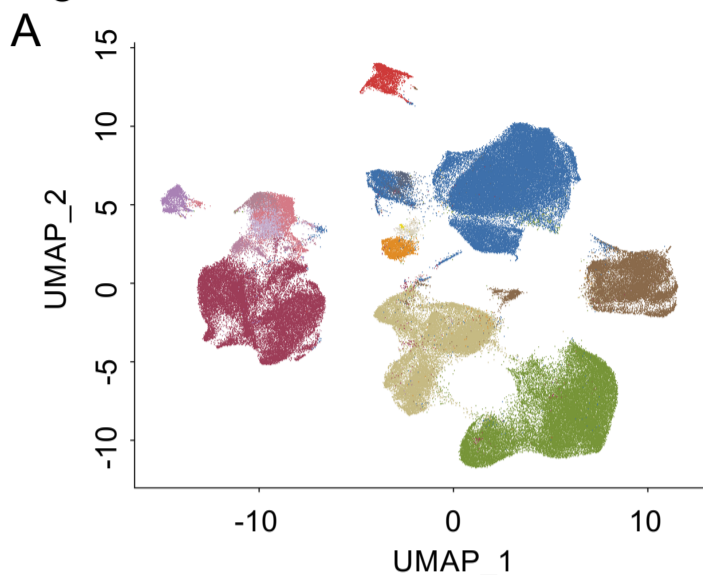

- Cardiomyocytes
- Epicardium
- Valve fibroblasts
- Smooth muscle
- Endothelium
- Lymphatic vessels
- Macrophages
- B-cells
- T-cells
- Thrombocytes
- Leukocytes
- Neutrophils
- Monocytes
- Schwann cells
- Neurons

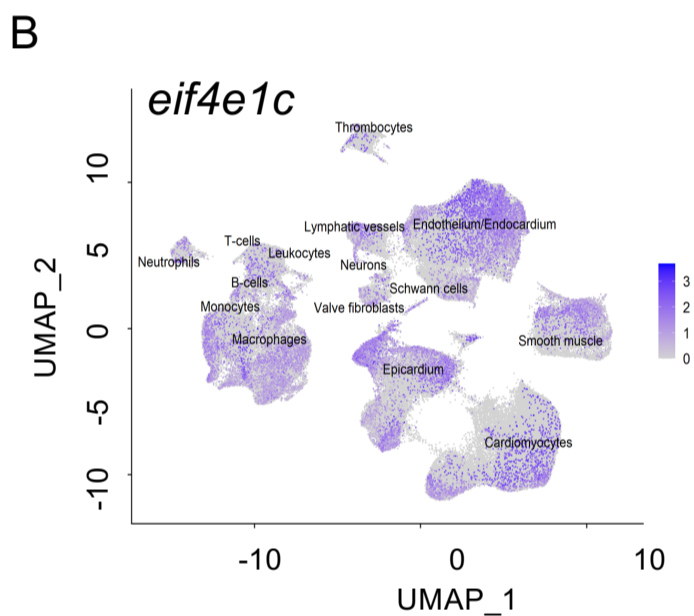

| Cell-types        | % <i>eif4e1c</i><br>(+) cells | % <i>eif4ea</i><br>(+) cells | % <i>eif4eb</i><br>(+) cells |
|-------------------|-------------------------------|------------------------------|------------------------------|
| Cardiomyocytes    | 4.58                          | 1.45                         | 4.47                         |
| Epicardium        | 17.51                         | 7.98                         | 14.46                        |
| Valve fibroblasts | 7.49                          | 3.39                         | 10.97                        |
| Smooth muscle     | 9.56                          | 5.50                         | 9.86                         |
| Endothelium       | 10.64                         | 4.44                         | 7.27                         |
| Lymphatic vessels | 12.86                         | 4.36                         | 8.18                         |
| Macrophages       | 13.67                         | 4.53                         | 5.36                         |
| B-cells           | 3.78                          | 1.19                         | 0.89                         |
| T-cells           | 1.94                          | 0.91                         | 0.67                         |
| Thrombocytes      | 2.69                          | 0.96                         | 1.69                         |
| Leukocytes        | 8.30                          | 2.26                         | 2.56                         |
| Neutrophils       | 5.89                          | 2.26                         | 2.39                         |
| Monocytes         | 11.49                         | 6.42                         | 3.54                         |
| Schwann cells     | 8.35                          | 4.85                         | 6.80                         |
| Neurons           | 42.86                         | 14.29                        | 2.04                         |

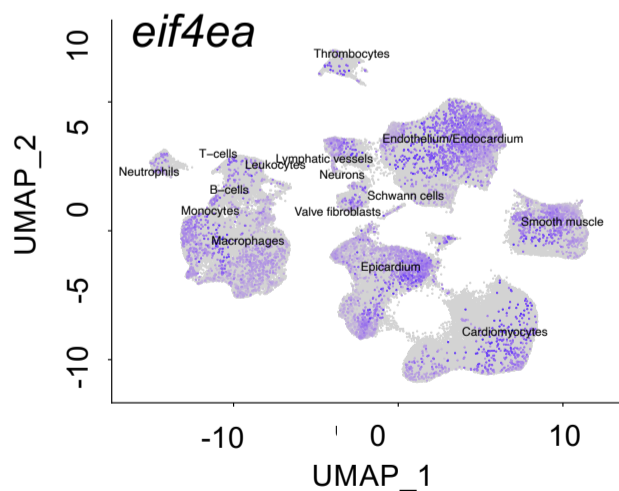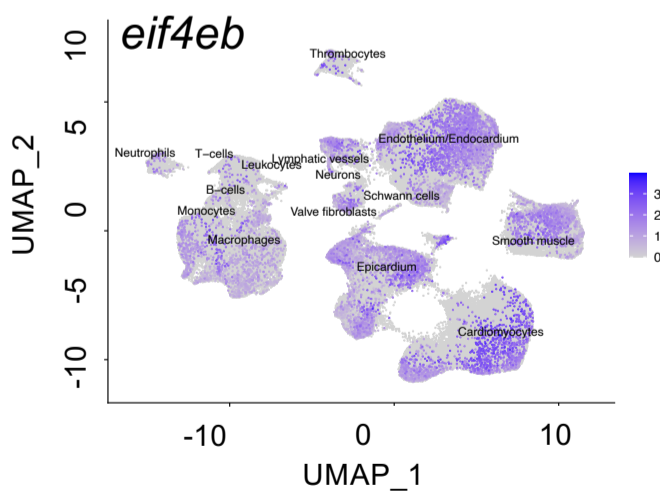

**Fig. S2. EIF4E homologs are expressed in all cell-types within zebrafish hearts.** (A) UMAP representation of single-cell RNA-seq data and clustering results of zebrafish hearts. (B) UMAP plots depicting *eif4e1c*, *eif4ea* and *eif4eb* expression. Right - Table showing the distribution of *eif4e1c* expressing cells in each cell clusters.

Figure S3

**A**

| Cross                            | Stage | N    | WT  | HETS | HOMS | chi <sup>2</sup> | p value  | Significant? |
|----------------------------------|-------|------|-----|------|------|------------------|----------|--------------|
| $\Delta eif4e1c$ HETS X HETS     | 3dpf  | 190  | 51  | 85   | 54   | 1.94             | 0.33     | no           |
|                                  | 4wpf  | 410  | 109 | 203  | 98   | 0.629            | 0.73     | no           |
|                                  | 8wpf  | 630  | 207 | 312  | 111  | 29.3             | 4.31E-07 | yes          |
|                                  | >3mpf | 1868 | 599 | 951  | 318  | 84.9             | 3.22E-19 | yes          |
| $\Delta eif4e1c$ HOMS ♀ X HETS ♂ | 3dpf  | 107  | N/A | 58   | 49   | 0.757            | 0.384    | no           |

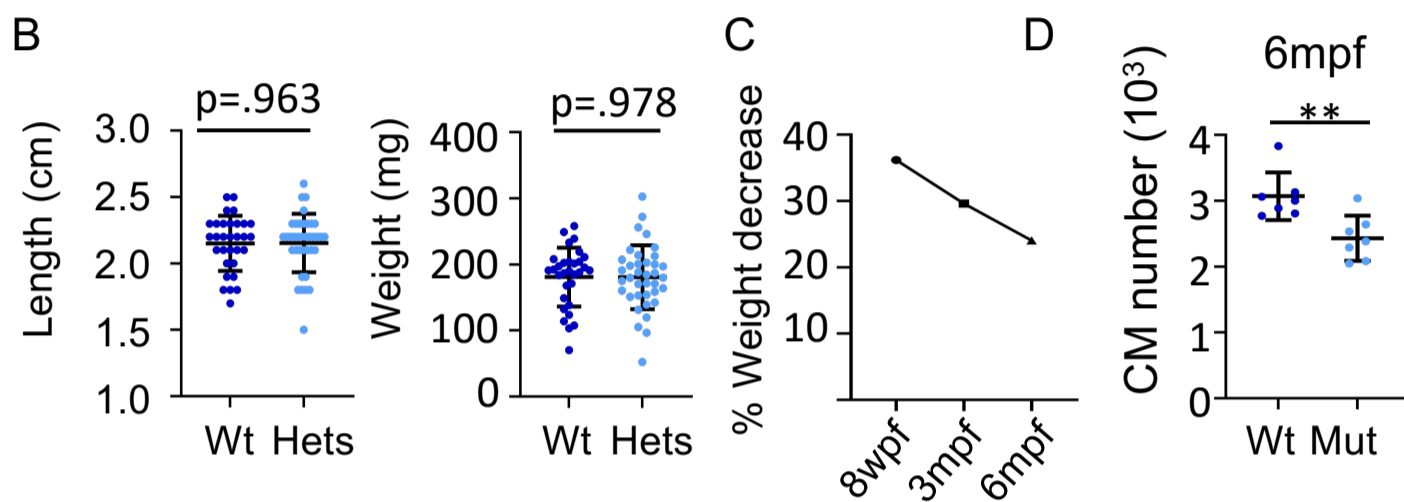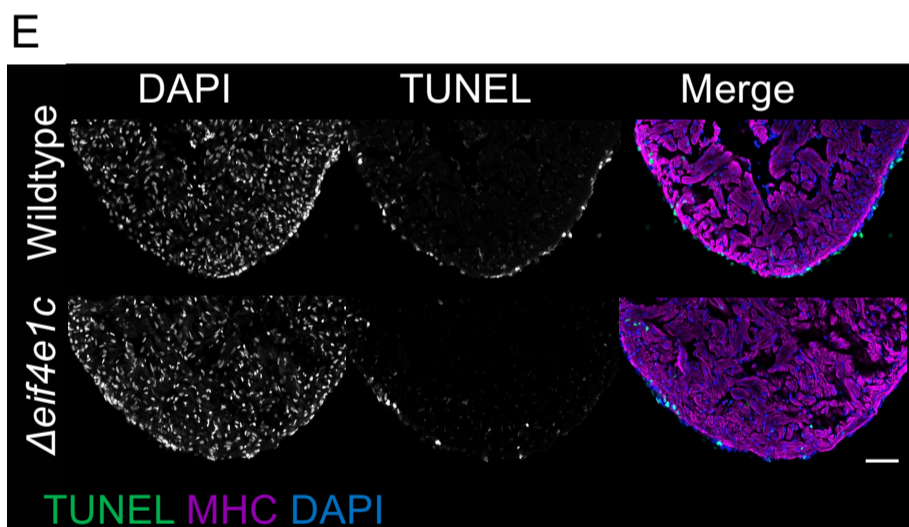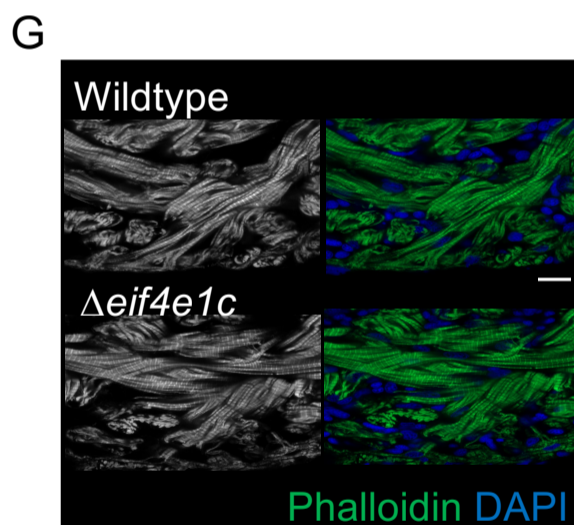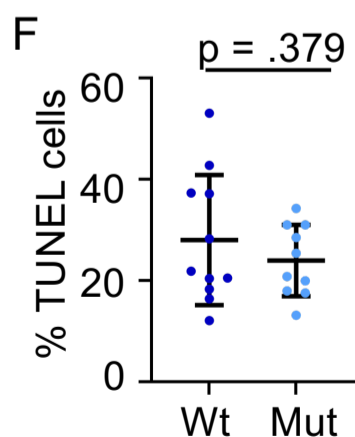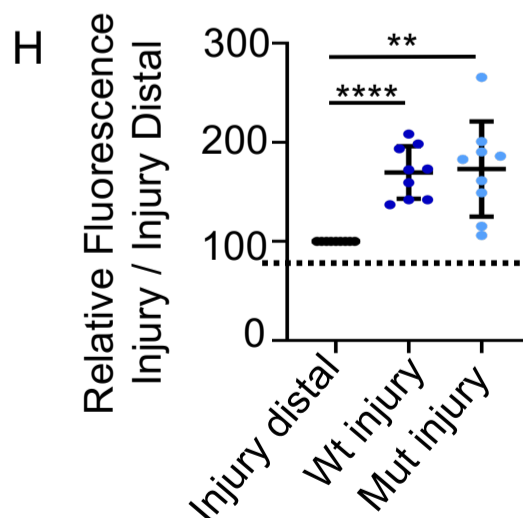



**Fig. S3. Heterozygotes for *Deif4e1c* were compared for length and weight with their wildtype siblings.** (A) Table showing survival of progeny from crosses of *Deif4e1c* heterozygote carriers. Clutches of fish were genotyped at the listed development stage (dpf, wpf and mpf represent days-, weeks- or months-post-fertilization). Significant deviations from Mendelian ratios were calculated using  $\chi^2$  and the resulting p-value is shown. (B) Fish were grown together, genotyped at the listed stage (top label) and immediately measured from jaw to the caudal fin bifurcation (Average length WT= 2.15cm and mutant= 2.15cm with N = 31 vs 37; Welch's t-test, p-value =0.963,). After measuring length, fish were dried and weighed (Average weight: wildtype = 181.0mg and mutant = 180.7mg with N = 31 vs 37; Welch's t-test, p-value = 0.978,). (C) The percent weight decrease between mutant and wildtype fish was calculated for each of the time points (D) CM numbers for wildtype and *Deif4e1c* mutants were counted at 6mpf from cryosections stained with an antibody for Mef2c (Scale bar = 100mm). The numbers of Mef2c positive cells were counted with MIPAR (average wildtype = 3070 and mutant = 2432 with N = 7 vs 7; Welch's t-test, p-value = 0.0055). (E) TUNEL staining of zebrafish hearts (Scale bar = 50mm). (F) Quantification of TUNEL stain showed no increase in the number of cells undergoing apoptosis in adult hearts (mean: wildtype = 28.03, mutant = 23.98; Welch's t-test, p-value = .379, N = 11 vs 10) (G) Phalloidin staining of wildtype (top) and mutant (bottom) zebrafish hearts. Left – Phalloidin in gray scale. Right – Merge of phalloidin with DAPI (Scale bar = 10mm). (H) Quantification of Eif4ea/b immunostaining from Figure 3G (wildtype mean increase (blue) = 1.70, Mann-Whitney p-value < 0.0001, N = 9 vs 9; mutant mean increase (light blue) = 1.73, Mann-Whitney p-value = 0.0018, N = 9 vs 9). Horizontal black bars display the mean (middle) or standard error (top and bottom).

Figure S4

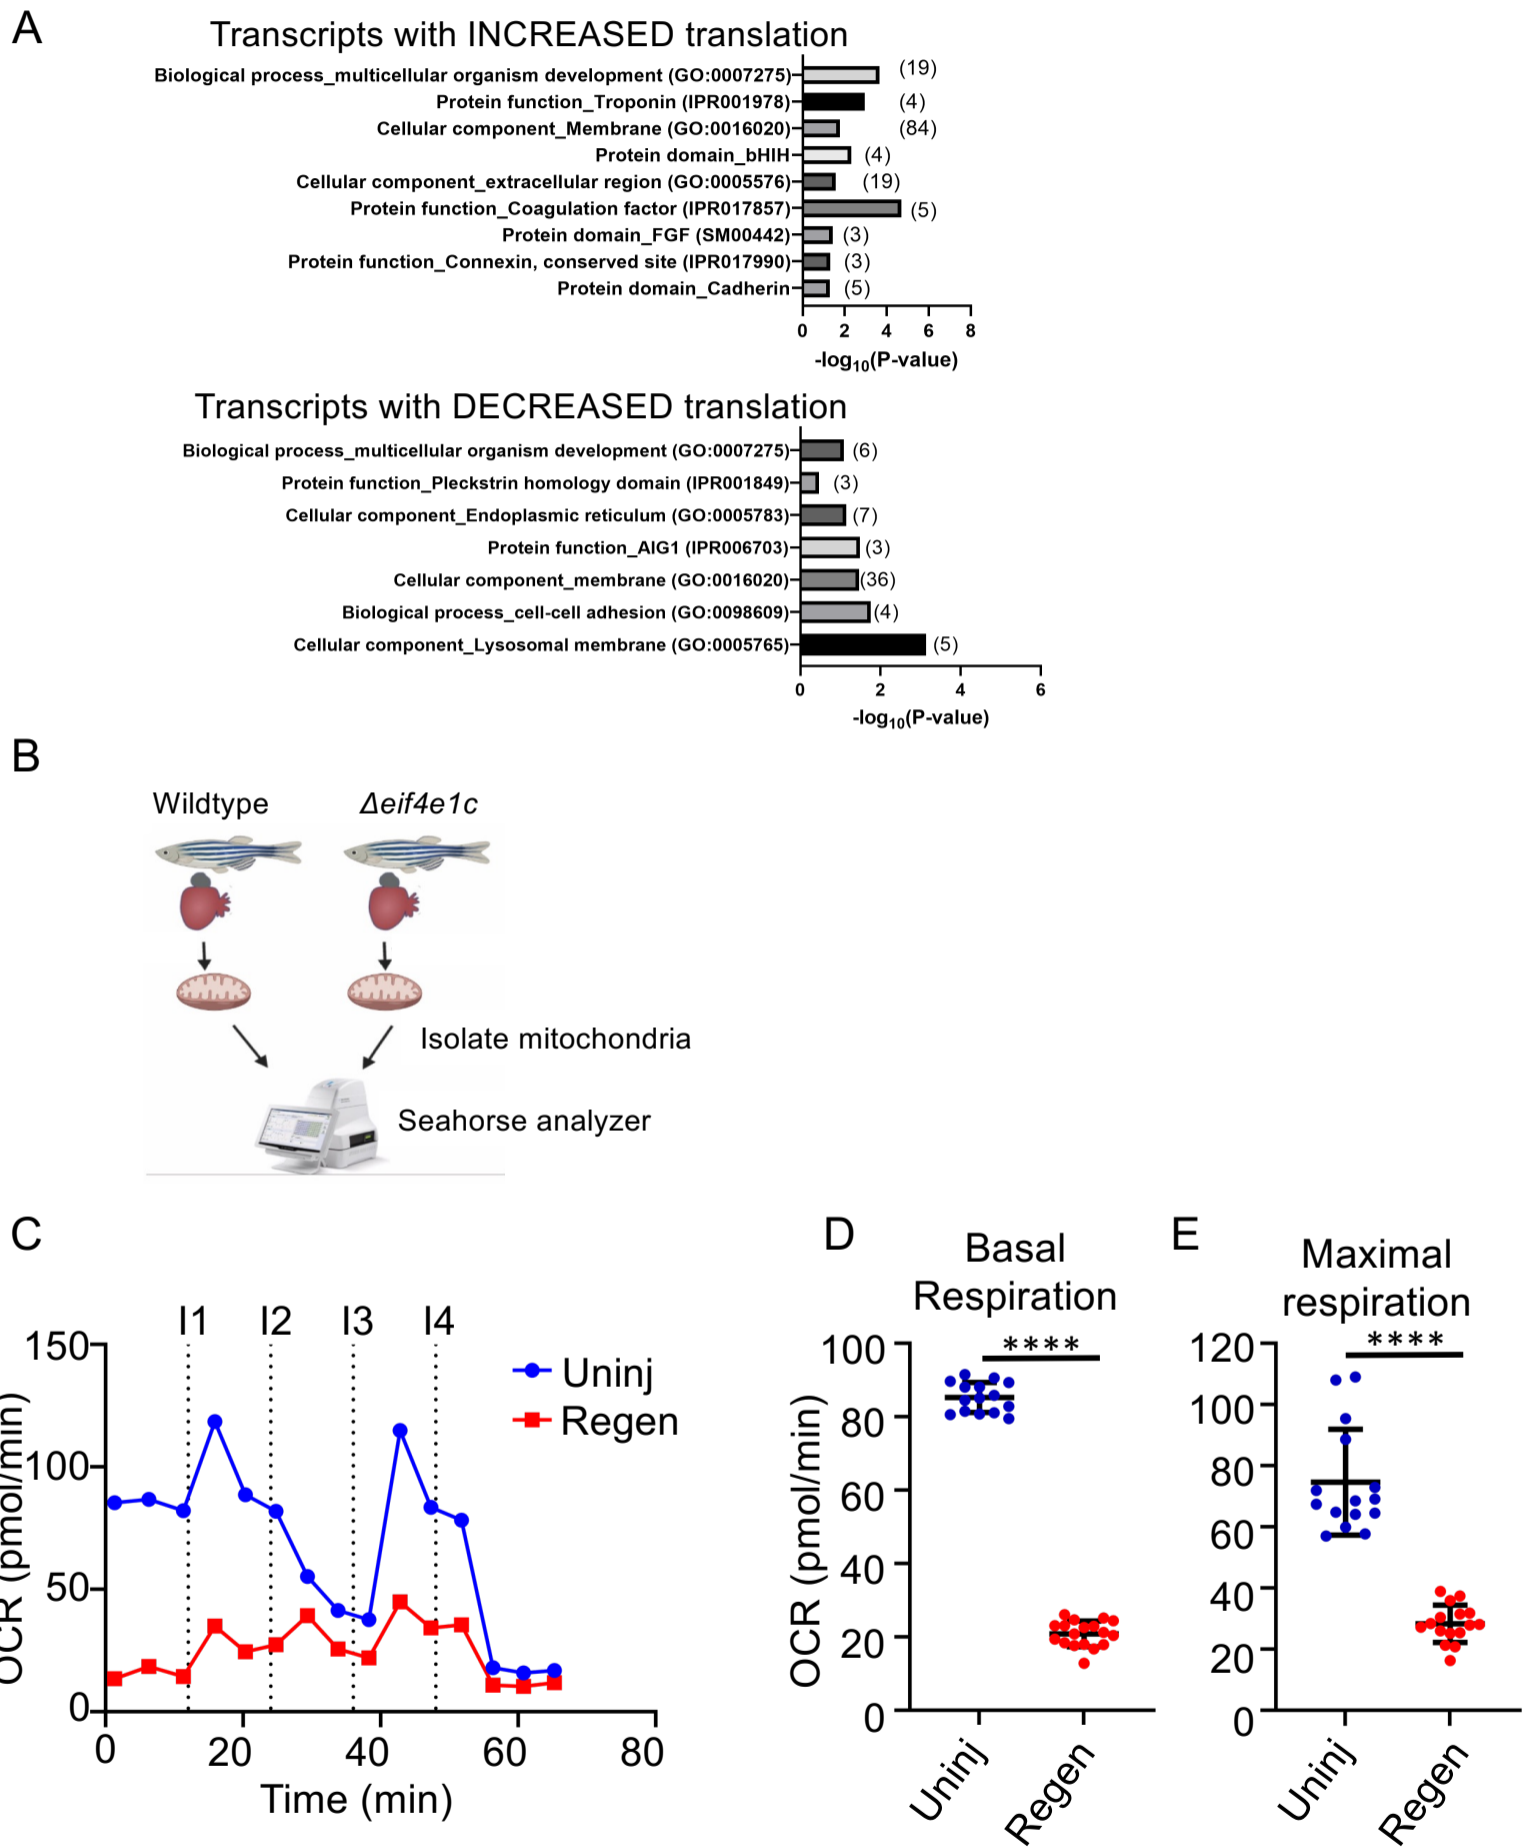

Fig. S4. (A) Gene ontology categories were discovered using the DAVID on-line platform. Each category is listed on the left with the identifier in parentheses. Shown are GO categories with p-value < 0.05, x-axis is  $-\log_{10}(\text{p-value})$ . Parentheses to the right of the bar indicate numbers of genes identified in each group. (B) Cartoon depicting experimental set-up for Seahorse analysis. Mitochondria were isolated from hearts dissected from wildtype and mutant fish and then processed on the Seahorse analyzer from Agilent. (C) Shown is a time-course of oxygen consumption rates (OCR) from mitochondria measured by the Seahorse analyzer. Hashed lines indicate time points of drug injection. The first injection (I1) is of ADP to stimulate respiration, the second injection (I2) is of oligomycin to inhibit ATP synthase (complex V) decreasing electron flow through transport chain, the third injection (I3) is of FCCP to uncouple the proton gradient, and the fourth injection (I4) is of antimycin A to inhibit complex III to shut down mitochondrial respiration. (D) Basal respiration is calculated as the OCR average after addition of ADP (I1 to I2) subtracting the non-mitochondrial respiration after injection of antimycin A (after I4) (mean: wildtype uninjured= 85.30 and wildtype regenerating= 20.90; Welch's t-test p value < 0.0001; N= 15,18). (E) Maximal respiration is calculated as the OCR average after FCCP addition (I3 to I4) subtracting the non-mitochondrial respiration after injection of antimycin A (after I4)(mean: wildtype uninjured= 74.64 and wildtype regenerating= 28.34; Mann-Whitney p-value < 0.0001; N= 15,18). For panels C-E, individual data points are represented by dots, uninjured is in blue, regenerating is in red, and horizontal black bars display the mean (middle) or standard error (top and bottom). Wildtype – Blue, Mutant – light blue.

Figure S5

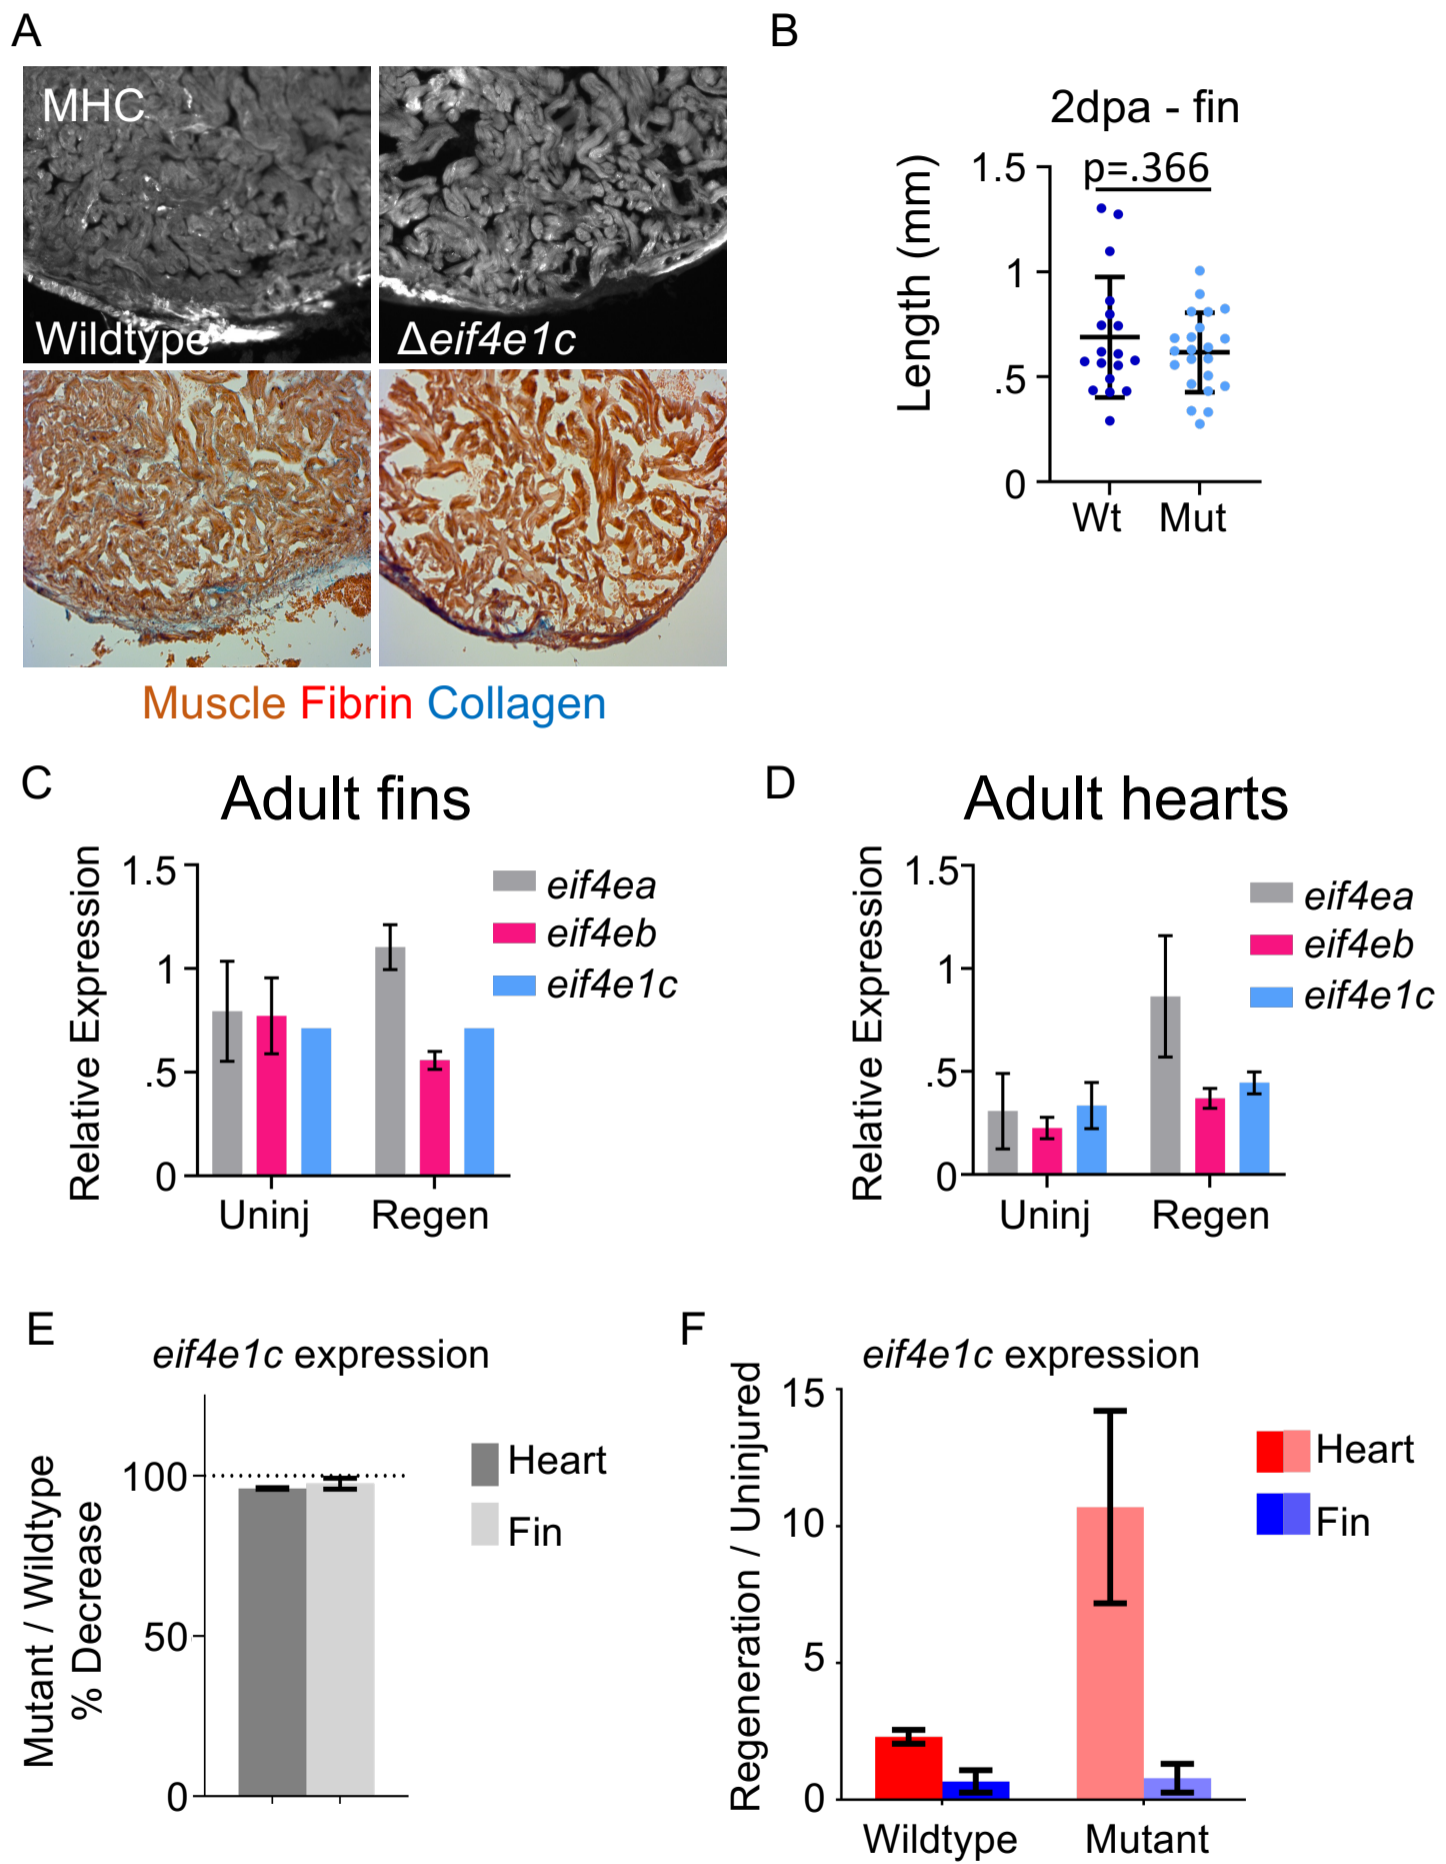

Fig. S5. (A) Images of sectioned ventricles at 28dpa are stained for Myosin heavy chain (MHC) to indicate cardiac muscle. Shown below are the same sections stained with AFOG which shows muscle (orange), Fibrin (red) and Collagen (blue). Hearts from 5 wildtype and 5  $\Delta eif4e1c$  mutants were ranked by injury size. Shown are representative hearts near the averages of the groups. (B) Caudal fins were amputated ~50% and the blastema were imaged 48 hours later for  $\Delta eif4e1c$  mutants and their wildtype siblings. The length of the blastema was measured from the tip of the 3<sup>rd</sup> ray using the Zeiss microscope software. There was no significant difference between the groups (2dpa average wildtype = 0.689mm and mutant = 0.617mm; Welch's t-test, p-value = 0.366, N = 18 vs 22). Horizontal black bars display the mean (middle) or standard error (top and bottom). (C) Expression of each transcript was normalized to *mob4* in uninjured fins (left) and fins undergoing regeneration (right). (D) same as (C) but for the heart. (E) RT-qPCR analysis of *eif4e1c* from uninjured hearts (r dark gray) and fins (light gray) in  $\Delta eif4e1c$  mutants. Ct values are normalized first to *mob4* and then to the wildtype values (hashed line). (F). RT-qPCR analysis of *eif4e1c* during regeneration of the heart (red) and the fin (blue). Wildtype is shown in dark colors (red and blue) and  $\Delta eif4e1c$  mutants are shown in light colors (pink and light blue).

## Figure S6

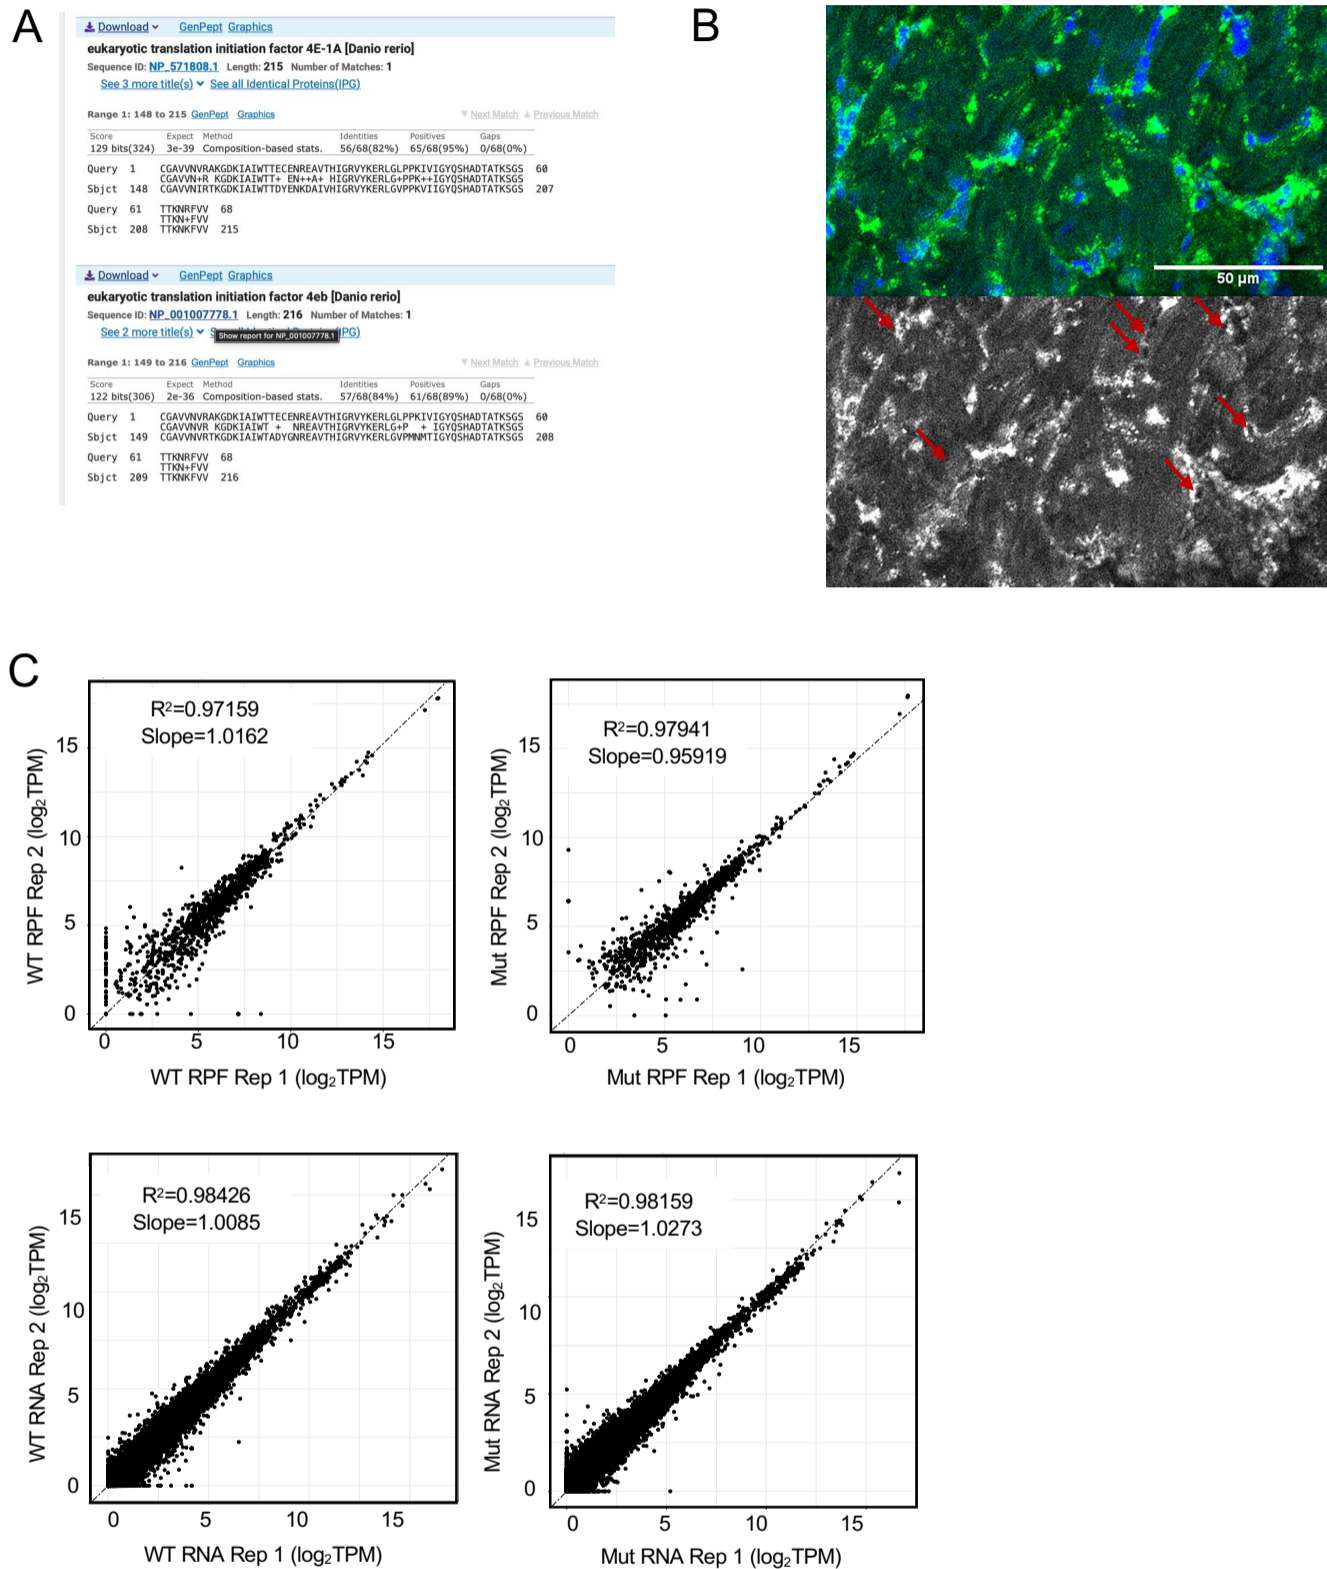

**Fig. S6.** (A) Region of human EIF4E1 (query) used to raise ab33768 is nearly identical in both paralogs of zebrafish canonical Eif4e1 (subject). (B) Immunofluorescence staining with ab33768 (green) on zebrafish hearts produces the expected cytoplasmic staining pattern (nuclei – blue). (C) Shown are the correlations between replicates for ribosome profiling (top) and RNA sequencing of the inputs (bottom) for both wildtype (left) and  $\Delta eif4e1c$  mutant (right) samples.
